# Supplementary material for: Systematic evaluation of NIPT aneuploidy detection software tools with clinically validated NIPT samples
Source: PubMed Central journal article supplement (PMC8722721; doi:10.1371/journal.pcbi.1009684), 2021-12-20
Supplement: pcbi.1009684.s001.pdf [file pcbi.1009684.s001.pdf]

**S1 Table. The number of false-negative and positive trisomy cases (with percentage) for each analysed software.**

| <b>M RPS</b> | <b>Metric</b> | <b>WisecondorX</b> | <b>RAPIDR</b> | <b>NIPTmer</b> | <b>NIPTeR<br/>NCV</b> | <b>NIPTeR</b> | <b>GIPseq</b> |
|--------------|---------------|--------------------|---------------|----------------|-----------------------|---------------|---------------|
| 20           | T21 FN        | 0 (0)              | 3 (0.735)     | 0 (0)          | 0 (0)                 | 0 (0)         | 0 (0)         |
| 20           | T21 FP        | 1 (0.243)          | 16 (3.922)    | 1 (0.243)      | 2 (0.485)             | 1 (0.243)     | 1 (0.245)     |
| 15           | T21 FN        | 0 (0)              | 3 (0.732)     | 0 (0)          | 0 (0)                 | 0 (0)         | 0 (0)         |
| 15           | T21 FP        | 0 (0)              | 9 (2.195)     | 0 (0)          | 1 (0.243)             | 1 (0.243)     | 0 (0)         |
| 10           | T21 FN        | 0 (0)              | 4 (0.973)     | 2 (0.485)      | 0 (0)                 | 0 (0)         | 0 (0)         |
| 10           | T21 FP        | 1 (0.243)          | 10 (2.433)    | 1 (0.243)      | 1 (0.243)             | 2 (0.485)     | 0 (0)         |
| 5            | T21 FN        | 0 (0)              | 4 (0.971)     | 2 (0.485)      | 0 (0)                 | 0 (0)         | 0 (0)         |
| 5            | T21 FP        | 0 (0)              | 8 (1.942)     | 0 (0)          | 0 (0)                 | 0 (0)         | 0 (0)         |
| 2.5          | T21 FN        | 2 (0.485)          | 6 (1.456)     | 5 (1.214)      | 2 (0.485)             | 2 (0.485)     | 1 (0.243)     |
| 2.5          | T21 FP        | 0 (0)              | 3 (0.728)     | 0 (0)          | 0 (0)                 | 0 (0)         | 0 (0)         |
| 1.25         | T21 FN        | 5 (1.214)          | 16 (3.883)    | 9 (2.184)      | 4 (0.971)             | 4 (0.971)     | 3 (0.728)     |
| 1.25         | T21 FP        | 1 (0.243)          | 0 (0)         | 1 (0.243)      | 0 (0)                 | 0 (0)         | 1 (0.243)     |
| 20           | T18 FN        | 0 (0)              | 8 (2.015)     | 0 (0)          | 0 (0)                 | 0 (0)         | 0 (0)         |
| 20           | T18 FP        | 1 (0.249)          | 0 (0)         | 0 (0)          | 0 (0)                 | NA            | 0 (0)         |
| 15           | T18 FN        | 0 (0)              | 8 (2.005)     | 1 (0.249)      | 0 (0)                 | 0 (0)         | 0 (0)         |
| 15           | T18 FP        | 2 (0.499)          | 0 (0)         | 0 (0)          | 0 (0)                 | 0 (0)         | 0 (0)         |
| 10           | T18 FN        | 0 (0)              | 8 (2)         | 1 (0.249)      | 0 (0)                 | 0 (0)         | 0 (0)         |
| 10           | T18 FP        | 1 (0.249)          | 0 (0)         | 0 (0)          | 0 (0)                 | 0 (0)         | 0 (0)         |
| 5            | T18 FN        | 0 (0)              | 8 (1.995)     | 1 (0.249)      | 0 (0)                 | 1 (0.249)     | 1 (0.249)     |
| 5            | T18 FP        | 0 (0)              | 1 (0.249)     | 0 (0)          | 0 (0)                 | 0 (0)         | 0 (0)         |
| 2.5          | T18 FN        | 1 (0.249)          | 8 (1.995)     | 3 (0.748)      | 3 (0.748)             | 3 (0.748)     | 1 (0.249)     |
| 2.5          | T18 FP        | 0 (0)              | 0 (0)         | 0 (0)          | 0 (0)                 | 0 (0)         | 0 (0)         |
| 1.25         | T18 FN        | 3 (0.748)          | 8 (1.995)     | 5 (1.247)      | 3 (0.748)             | 4 (0.998)     | 2 (0.499)     |
| 1.25         | T18 FP        | 0 (0)              | 0 (0)         | 1 (0.249)      | 0 (0)                 | 0 (0)         | 1 (0.249)     |
