# Supplementary material for: Systematic evaluation of NIPT aneuploidy detection software tools with clinically validated NIPT samples
Source: PubMed Central journal article supplement (PMC8722721; doi:10.1371/journal.pcbi.1009684), 2021-12-20
Supplement: pcbi.1009684.s002.pdf [file pcbi.1009684.s002.pdf]

**S2 Table. Summary information for each analysed sample group.** The summary includes coverage group, average read count in millions of reads (M RPS), condition, coverage standard deviation, minimum, average and maximum read count and a number of samples (N).

| M RPS | Sample Group               | SD        | Min        | Average    | Max        | N   |
|-------|----------------------------|-----------|------------|------------|------------|-----|
| 20    | T21 (clinically validated) | 4,277,096 | 14,347,516 | 24,163,449 | 32,626,785 | 19  |
| 15    | T21 (clinically validated) | 3,148,835 | 10,937,064 | 18,083,151 | 24,334,564 | 19  |
| 10    | T21 (clinically validated) | 2,081,671 | 7,209,906  | 11,958,958 | 16,127,678 | 19  |
| 5     | T21 (clinically validated) | 1,048,024 | 3,670,427  | 6,023,952  | 8,173,000  | 19  |
| 2.5   | T21 (clinically validated) | 523,966   | 1,833,823  | 3,011,415  | 4,086,277  | 19  |
| 1.25  | T21 (clinically validated) | 262,260   | 915,450    | 1,505,824  | 2,042,374  | 19  |
| 20    | T18 (clinically validated) | 2,791,633 | 18,450,798 | 23,124,624 | 27,336,184 | 8   |
| 15    | T18 (clinically validated) | 2,071,817 | 14,024,066 | 17,350,621 | 20,485,890 | 8   |
| 10    | T18 (clinically validated) | 1,395,351 | 9,235,616  | 11,476,668 | 13,625,081 | 8   |
| 5     | T18 (clinically validated) | 697,871   | 4,685,815  | 5,794,650  | 6,891,991  | 8   |
| 2.5   | T18 (clinically validated) | 348,455   | 2,344,985  | 2,898,169  | 3,446,589  | 8   |
| 1.25  | T18 (clinically validated) | 174,390   | 1,172,245  | 1,449,377  | 1,722,745  | 8   |
| 20    | T13 (clinically validated) | 2,980,546 | 19,042,280 | 22,183,555 | 24,971,957 | 3   |
| 15    | T13 (clinically validated) | 2,257,362 | 14,500,538 | 16,725,422 | 19,013,917 | 3   |
| 10    | T13 (clinically validated) | 1,469,534 | 9,567,867  | 11,039,287 | 12,506,927 | 3   |
| 5     | T13 (clinically validated) | 742,824   | 4,870,521  | 5,591,835  | 6,354,446  | 3   |
| 2.5   | T13 (clinically validated) | 370,783   | 2,435,984  | 2,796,437  | 3,176,752  | 3   |
| 1.25  | T13 (clinically validated) | 184,533   | 1,219,133  | 1,398,883  | 1,587,854  | 3   |
| 20    | Validation Low Risk        | 3,594,972 | 13,643,477 | 23,747,773 | 32,396,033 | 393 |
| 15    | Validation Low Risk        | 2,688,192 | 10,345,586 | 17,800,264 | 24,374,332 | 393 |
| 10    | Validation Low Risk        | 1,791,357 | 6,839,734  | 11,799,169 | 16,181,461 | 393 |
| 5     | Validation Low Risk        | 896,917   | 3,453,849  | 5,944,443  | 8,061,718  | 393 |
| 2.5   | Validation Low Risk        | 448,456   | 1,726,568  | 2,972,178  | 4,028,665  | 393 |
| 1.25  | Validation Low Risk        | 224,239   | 863,244    | 1,486,192  | 2,014,776  | 393 |
| 20    | Reference                  | 6,032,848 | 11,534,450 | 23,506,647 | 55,026,706 | 669 |
| 15    | Reference                  | 4,531,992 | 8,656,925  | 17,654,442 | 41,383,148 | 669 |
| 10    | Reference                  | 3,013,960 | 5,736,648  | 11,695,518 | 27,432,704 | 669 |
| 5     | Reference                  | 1,516,731 | 2,919,971  | 5,942,981  | 13,920,933 | 669 |
| 2.5   | Reference                  | 758,325   | 1,458,860  | 2,971,523  | 6,957,681  | 669 |
| 1.25  | Reference                  | 379,135   | 729,274    | 1,485,737  | 3,476,940  | 669 |
